# Supplementary material
Source: PubMed Central journal article supplement (PMC6456859)
Supplement: JB.00804-18-s0001.pdf [file JB.00804-18-s0001.pdf]

**Supplemental Information for:**

**Rcs phosphorelay activation in cardiolipin-deficient *Escherichia coli* reduces biofilm  
formation**

Julia F. Nepper<sup>1</sup>, Yin C. Lin<sup>1</sup>, Douglas B. Weibel<sup>1,2,3\*</sup>

1. *Department of Biochemistry, University of Wisconsin-Madison, Madison, WI, USA*

2. *Department of Chemistry, University of Wisconsin-Madison, Madison, WI, USA*

3. *Department of Biomedical Engineering, University of Wisconsin-Madison, Madison, WI,  
USA*

Running title: Biofilm reduction in cardiolipin-deficient *E. coli*

\*Address correspondence to Douglas B. Weibel, [douglas.weibel@wisc.edu](mailto:douglas.weibel@wisc.edu)

## Supplemental Methods

***Determination of fim invertible element orientation.*** We grew *E. coli* cells in 96 well microplates and used sonication to harvest biofilm cells as described above. We used an Epicentre Master Pure Complete DNA and RNA Purification kit (Madison, WI, USA) to extract genomic DNA from cells. Multiplex PCR was performed using New England Biolabs Q5 High-Fidelity DNA Polymerase (Ipswich, MA, USA), following the manufacturer's instructions. Primers were included to amplify off-oriented *fimAp* (INV and FIME), on-oriented *fimAp* (INV and FIMA), and *ftsZ* (EcFtsZ 1 and EcFtsZ 2; loading control) (1, 2).

## Tables

**Table S1.** Strains of *E. coli* used in this study

| Strain name                              | Relevant genotype                                                                                                                                                                                                                                                                                   | Reference           |
|------------------------------------------|-----------------------------------------------------------------------------------------------------------------------------------------------------------------------------------------------------------------------------------------------------------------------------------------------------|---------------------|
| MG1655                                   | Wild-type <i>E. coli</i>                                                                                                                                                                                                                                                                            | Laboratory strain   |
| PO10                                     | MG1655 $\Delta$ <i>clsABC</i> ::FRT                                                                                                                                                                                                                                                                 | (3)                 |
| $\Delta$ <i>clsA</i>                     | MG1655 $\Delta$ <i>clsA</i> ::FRT                                                                                                                                                                                                                                                                   | This work           |
| $\Delta$ <i>clsB</i>                     | MG1655 $\Delta$ <i>clsB</i> ::FRT                                                                                                                                                                                                                                                                   | This work           |
| $\Delta$ <i>clsC</i>                     | MG1655 $\Delta$ <i>clsC</i> ::FRT                                                                                                                                                                                                                                                                   | This work           |
| $\Delta$ <i>clsBC</i>                    | MG1655 $\Delta$ <i>clsBC</i> ::FRT-kan-FRT                                                                                                                                                                                                                                                          | This work           |
| $\Delta$ <i>clsAC</i>                    | MG1655 $\Delta$ <i>clsAC</i> ::FRT-kan-FRT                                                                                                                                                                                                                                                          | This work           |
| $\Delta$ <i>clsAB</i>                    | MG1655 $\Delta$ <i>clsAB</i> ::FRT-kan-FRT                                                                                                                                                                                                                                                          | This work           |
| $\Delta$ <i>flhD</i>                     | BW25113 $\Delta$ <i>flhD</i> ::FRT-kan-FRT                                                                                                                                                                                                                                                          | (4)                 |
| $\Delta$ <i>cls</i> $\Delta$ <i>rcaA</i> | MG1655 $\Delta$ <i>clsABC</i> ::FRT $\Delta$ <i>rcaA</i> ::FRT-cam-FRT                                                                                                                                                                                                                              | This work           |
| $\Delta$ <i>cls</i> $\Delta$ <i>rcaC</i> | MG1655 $\Delta$ <i>clsABC</i> ::FRT $\Delta$ <i>rcaC</i> ::FRT-cam-FRT                                                                                                                                                                                                                              | This work           |
| $\Delta$ <i>cls</i> $\Delta$ <i>rcaF</i> | MG1655 $\Delta$ <i>clsABC</i> ::FRT $\Delta$ <i>rcaF</i> ::FRT-cam-FRT                                                                                                                                                                                                                              | This work           |
| DH5 $\alpha$                             | F <sup>-</sup> <i>endA1 glnV44 thi-1 recA1 relA1 gyrA96 deoR nupG</i> $\Phi$ 80 <i>lacZ</i> $\Delta$ M15 $\Delta$ ( <i>lacZYA-argF</i> )U169, <i>hsdR17</i> (r $\kappa$ <sup>-</sup> m $\kappa$ <sup>+</sup> ), $\lambda$ <sup>-</sup>                                                              | Laboratory strain   |
| 5-alpha F' I <sup>q</sup>                | F' <i>proA</i> <sup>+</sup> <i>B</i> <sup>+</sup> <i>lacI</i> <sup>q</sup> $\Delta$ ( <i>lacZ</i> )M15 <i>zzf</i> ::Tn10 (Tet <sup>R</sup> ) / <i>fhuA2</i> $\Delta$ ( <i>argF-lacZ</i> )U169 <i>phoA glnV44</i> $\Phi$ 80 $\Delta$ ( <i>lacZ</i> )M15 <i>gyrA96 recA1 relA1 endA1 thi-1 hsdR17</i> | New England Biolabs |

**Table S2.** Plasmids used in this study

| <b>Plasmid</b>                       | <b>Relevant genotype</b>                                             | <b>Reference</b> |
|--------------------------------------|----------------------------------------------------------------------|------------------|
| pMP4641                              | TetR                                                                 | (5)              |
| pMP4658                              | TetR                                                                 | (5)              |
| pBad33                               | Low copy arabinose inducible expression plasmid                      | (6)              |
| pBad33- <i>clsA</i>                  | <i>clsA</i> inserted between XbaI and SphI sites; CamR               | This work        |
| pBad33- <i>clsB</i>                  | <i>clsB</i> inserted between XbaI and HindIII sites; CamR            | This work        |
| pBad33- <i>ymdBC</i>                 | <i>ymdB-clsC</i> inserted between XbaI and HindIII sites; CamR       | This work        |
| pBad33- <i>clsA</i> (H224F<br>H404F) | <i>clsA</i> with H224F and H404F substitutions                       | This work        |
| pBad33- <i>clsB</i> (H113A)          | <i>clsB</i> with H113A substitution                                  | This work        |
| pBad33- <i>clsB</i> (H290A)          | <i>clsB</i> with H290A substitution                                  | This work        |
| pBad33- <i>ymdB-ymdC</i> (H130A)     | <i>clsC</i> with H130A substitution, <i>ymdB</i> wild-type           | This work        |
| pBad33- <i>ymdB-ymdC</i> (H369A)     | <i>clsC</i> with H369A substitution, <i>ymdB</i> wild-type           | This work        |
| pBad33- <i>phoA</i>                  | <i>phoA</i> inserted into X site; CamR                               | This work        |
| pCP20                                | FLP recombinase expression plasmid; AmpR CamR; temperature sensitive | (7)              |
| pKD3                                 | AmpR CamR                                                            | (7)              |
| pKD46                                | AmpR; temperature sensitive                                          | (7)              |
| pBad33- <i>ompA-6XHis</i>            | CamR                                                                 | This work        |

**Table S3. Primers**

| Name                  | Sequence (5'→3')        |
|-----------------------|-------------------------|
| INV <sup>1</sup>      | GAGGTGATGTGAAATTAATTTAC |
| FIMA <sup>1</sup>     | GATGCGGTACGAACCTGTCC    |
| FIME <sup>1</sup>     | GCAGGCGGTTTGTACGGGG     |
| EcFtsZ 1 <sup>2</sup> | TAGCGGTATCACCAAAGGACT   |
| EcFtsZ 2 <sup>2</sup> | GTGATCAGAGAGTTCACATGCT  |

<sup>1</sup>Schwan *et al.* (1992), *J Bacteriol*

<sup>2</sup>Schwan *et al.* (2007), *J Bacteriol*

| qPCR              |                         |                          |
|-------------------|-------------------------|--------------------------|
| Gene              | Forward (5'→3')         | Reverse (5'→3')          |
| clsA              | ATATAATCGTCCTGAACGGCGGC | TGGTATGCAGTAACCCGCCTTCA  |
| clsB              | TAAAAAGTGGAACGCCAGCACG  | AGTGACAAACTGAGCGGATCGAGA |
| clsC              | CCGAAATGGCAGAGCATACGCTC | CGCTTGCTTGACAGTCATCCACG  |
| cpsB              | GTTGGCTCCTGGTCTTCATTA   | CAGGCCAGATTCAGCATACA     |
| cpsG              | TGACGTGCTGGATATTGGTATG  | GATTATGGCTGGCGGTAAC      |
| degP              | GCCTTCAGTGGTCAGCATT     | GGCAGAACGGAGAATCATCA     |
| htrA              | TATCGCGCTGATCCAAATCC    | ACCAATCGCTACGGTGTAATC    |
| mdtA              | CAAGCAGGTTGATGTTGGTAAC  | CCGGCAGGGTAAAGACTAAAT    |
| acrD              | TGACCTCGCTGGCATTATC     | CGAAATCATCCCGCCATTA      |
| pspA              | CTGATGATCCAGGAGATGGAAG  | TGTTCAATACGGCGAGTCAG     |
| pspC              | CTGGTGGTGCTGTCGATTT     | AAGGTAGCTGCTCACCAAAG     |
| idnT <sup>3</sup> | CTGTTTAGCGAAGAGGAGATGC  | ACAAACGGCGGCGATAGC       |
| gapA <sup>4</sup> | GTGATCCGGCTAACCTGAAA    | GTCTGGCCAGCATATTTGT      |

<sup>3</sup>Zhou *et al.* (2011), *BMC Mol Biol*

<sup>4</sup>Uchiyama *et al.* (2010), *FEMS Microbiol Lett*

**Table S4.** Minimum inhibitory concentration (MIC) of antimicrobial compounds in *E. coli* grown at 30°C in M9 minimal medium supplemented with amino acids. Values shown are the averages of 3 independent biological replicates and the standard error of the mean.

| <b>Compound</b>          | <b>MG1655</b> |   |      | <b><i>ΔclsABC</i></b> |   |     |
|--------------------------|---------------|---|------|-----------------------|---|-----|
| Cecropin A <sup>a</sup>  | 12.5          | ± | 0    | 4.1                   | ± | 1.1 |
| Ampicillin <sup>a</sup>  | 16.0          | ± | 2.7  | 13.3                  | ± | 2.7 |
| Kanamycin <sup>a</sup>   | 16.0          | ± | 5.3  | 10.7                  | ± | 2.7 |
| EDTA <sup>a</sup>        | 64.0          | ± | 10.7 | 16.0                  | ± | 0   |
| Polymyxin B <sup>a</sup> | 8.7           | ± | 4.1  | 4.0                   | ± | 0   |
| Cefuroxime <sup>a</sup>  | 32.0          | ± | 0    | 8.0                   | ± | 4.0 |

<sup>a</sup> Values in µg/mL

## Supplemental Figures

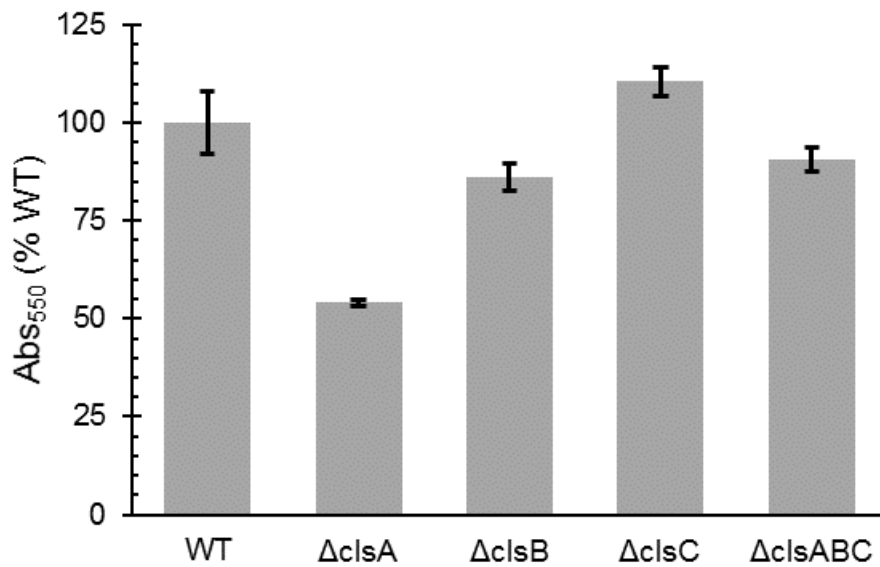

**Figure S1. Surface attachment in rich nutrient medium.** Cells were grown in lysogeny broth (LB) in microtiter plates for 24 h at 30°C without shaking. Adherent cells were stained with crystal violet (CV), and CV absorbance was measured at 550 nm. Error bars indicate standard error (N ≥ 6); differences between strains were not significant based on a Student's *t* test ( $p > 0.05$ ), except WT vs. *ΔclsA* ( $p < 0.0001$ ).

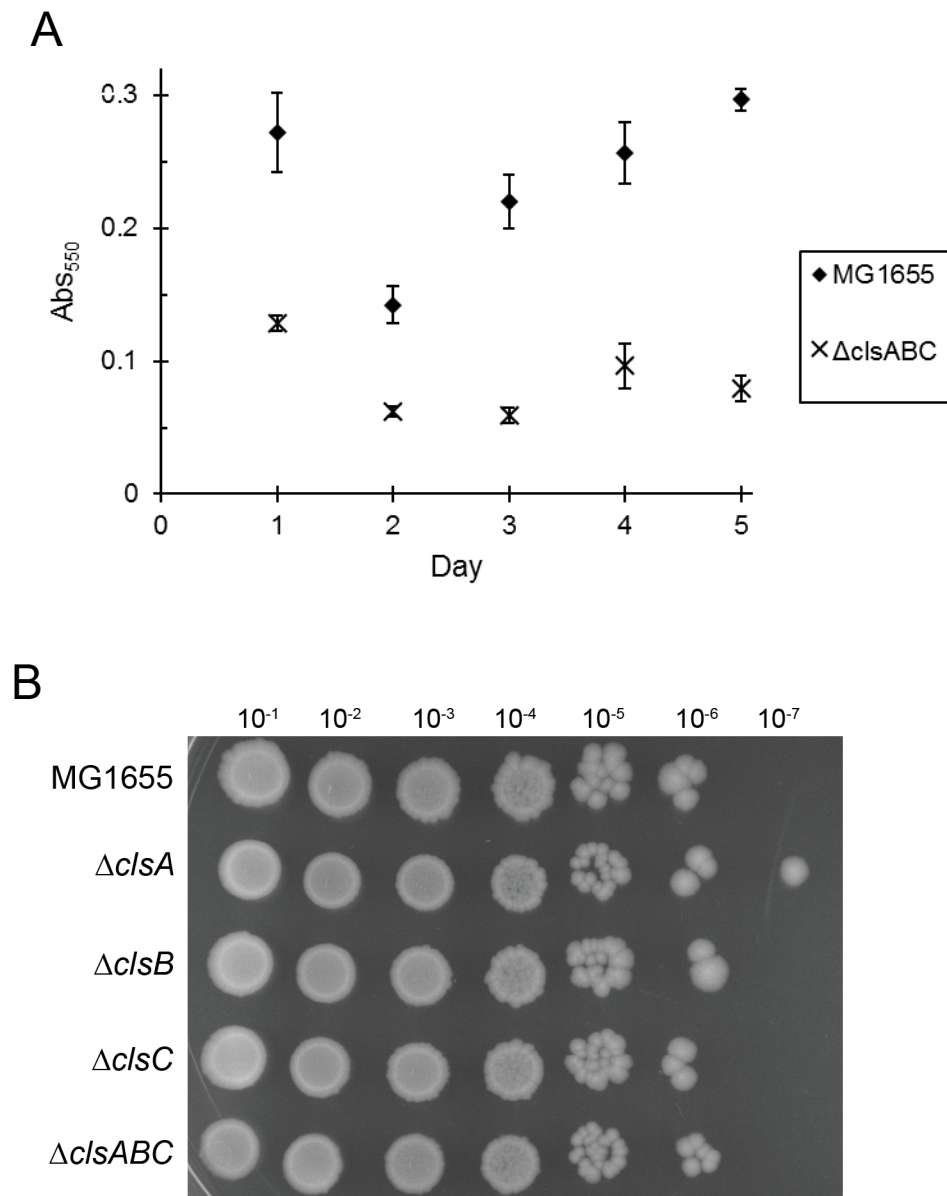

**Figure S2. Surface attachment over multiple days.** Cells were grown in microtiter plates for 24 h at 30°C without shaking. (A) Adherent cells were stained with crystal violet (CV), and CV absorbance was measured at 550 nm. Error bars indicate standard error (N ≥ 6). (B) Colony forming units were determined for 5 day-old cultures.



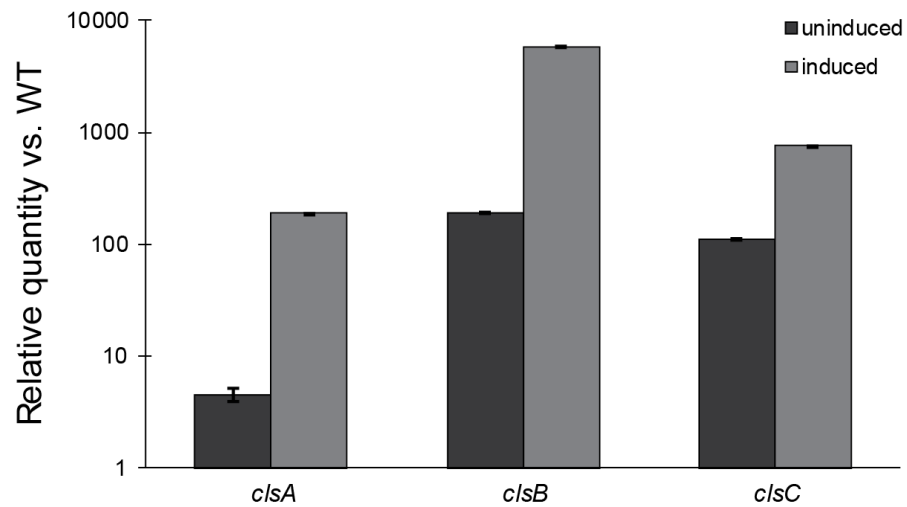

**Figure S3. Induction level of *cls* transcripts.** We extracted RNA from 24 h old cultures grown with (induced) or without (uninduced) 0.2% arabinose to stimulate protein expression. All strains lacked a chromosomal copy of one *cls* gene, which was replaced with a vector copy of the gene in the arabinose-inducible plasmid pBad33 (e.g.  $\Delta clsA/pBad33-clsA$ ).

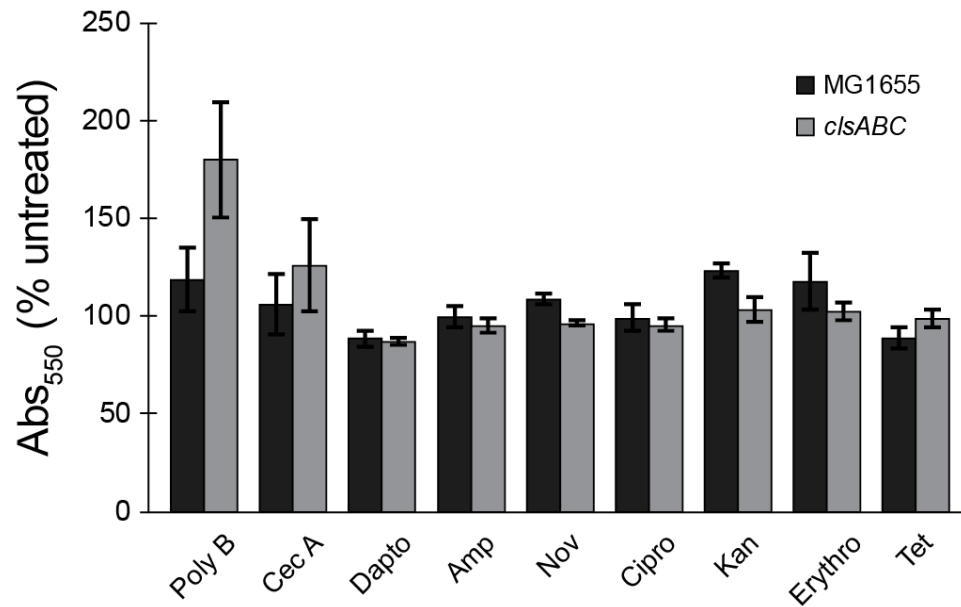

**Figure S4. Effect of treatment with antimicrobials on biofilm formation in  $\Delta clsABC$**

**cells.** Cells were grown in M9 minimal medium in microtiter plates for 24 h at 37°C without shaking, then treated with antimicrobial compounds for 24 h as described in the Materials and Methods. Adherent cells were stained with CV, and CV absorbance was measured at 550 nm. Abs values were normalized to those obtained from untreated controls. Error bars indicate standard error (N ≥ 16); (Poly B, polymyxin B; Cec A, cecropin A; Dapto, daptomycin; Amp, ampicillin; Nov, novobiocin; Cipro, ciprofloxacin; Kan, kanamycin; Erythro, erythromycin; Tet, tetracycline).

**A**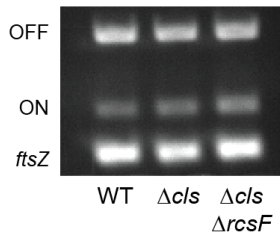**B**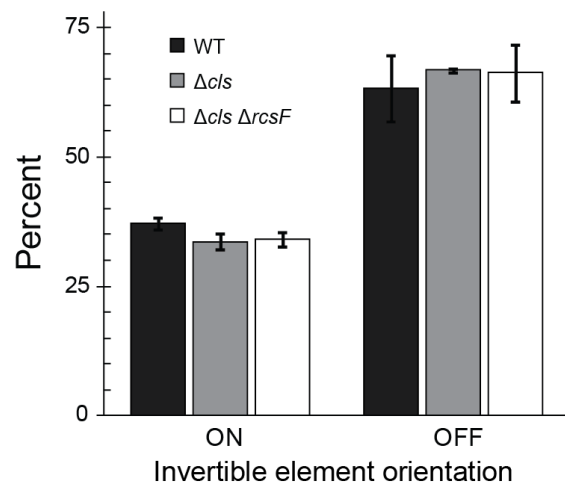

**Figure S5. Fimbriation of CL deficient cells.** Genomic DNA was extracted from *E. coli* biofilms as described in the Materials and Methods and PCR was used to determine the orientation of the FimA invertible element. (A) INV and FIMA primers amplify phase-on oriented DNA (450 bp product), INV and FIME primers amplify phase-off oriented DNA (750 bp product), and EcFtsZ1 and 2 primers amplify a 302 bp segment of the *ftsZ* gene. (B) ImageJ was used to determine the intensity of DNA bands, which were normalized to the *ftsZ* loading control. Error bars indicate standard error (N = 3); differences between strains were not significant based on a Student's *t* test ( $p > 0.05$ ).

## References

1. **Schwan WR, Seifert HS, Duncan JL.** 1992. Growth conditions mediate differential transcription of fim genes involved in phase variation of type 1 pili. *J Bacteriol* **174**:2367-2375.
2. **Schwan WR, Shibata S, Aizawa S, Wolfe AJ.** 2007. The two-component response regulator RcsB regulates type 1 piliation in *Escherichia coli*. *J Bacteriol* **189**:7159-7163.
3. **Oliver PM, Crooks JA, Leidl M, Yoon EJ, Saghatelian A, Weibel DB.** 2014. Localization of anionic phospholipids in *Escherichia coli* cells. *J Bacteriol* **196**:13.
4. **Baba T, Ara T, Hasegawa M, Takai Y, Okumura Y, Baba M, Datsenko KA, Tomita M, Wanner BL, Mori H.** 2006. Construction of *Escherichia coli* K-12 in-frame, single-gene knockout mutants: the Keio collection. *Mol Syst Biol* **2**:20060008.
5. **Bloemberg GV, Wijfjes AHM, Lamers GEM, Stuurman N, Lugtenberg BJJ.** 2000. Simultaneous imaging of *Pseudomonas fluorescens* WCS365 populations expressing three different autofluorescent proteins in the rhizosphere: new perspectives for studying microbial communities. *Mol Plant Microbe Interact* **13**:7.

6. **Guzman LM, Belin D, Carson MJ, Beckwith J.** 1995. Tight regulation, modulation, and high-level expression by vectors containing the arabinose PBAD promoter. *J Bacteriol* **177**:4121-4130.
7. **Datsenko KA, Wanner BL.** 2000. One-step inactivation of chromosomal genes in *Escherichia coli* K-12 using PCR products. *Proc Natl Acad Sci U S A* **97**:6640-6645.
8. **Zhou K, Zhou L, Lim Q, Zou R, Stephanopoulos G, Too HP.** 2011. Novel reference genes for quantifying transcriptional responses of *Escherichia coli* to protein overexpression by quantitative PCR. *BMC Mol Biol* **12**:18.
9. **Uchiyama J, Sasaki Y, Hagahama H, Ito A, Matsuoka S, Matsumoto K, Hara H.** 2010. Accumulation of  $\sigma^S$  due to enhanced synthesis and decreased degradation in acidic phospholipid-deficient *Escherichia coli* cells. *FEMS Microbiol Lett* **307**:8.
